# Supplementary material for: Endocrine system dysfunction and chronic heart failure: a clinical perspective
Source: Springer Nature journal article supplement (doi:10.1007/s12020-021-02912-w), 2021-10-28
Supplement: MOESM1 [file 19807502]

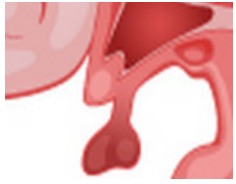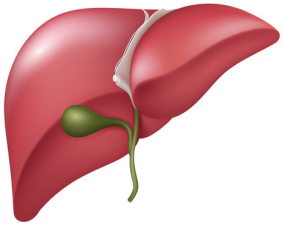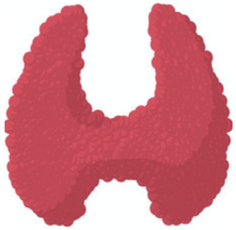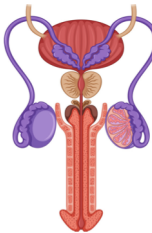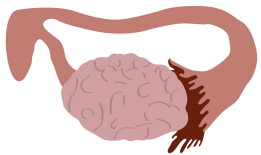

**Endocrine dysfunction**

SIADH

GHD

IGF-1

NTIS

Hypothyroidism

Hyperthyroidism

AITD

Male

hypogonadism

Menopause

Fluid retention  
Dilutional hyponatremia

Diastolic dysfunction  
Reduced cardiac load  
Insulin resistance  
Hyperglycemia (oxidative stress, metabolic shift)

Diastolic dysfunction  
Reduced cardiac load

Bradycardia  
Tachycardia  
Hyperdynamic circulation  
Oxygen consumption ↑

Myocardial tropism  
Ischemic damage susceptibility ↑  
Insulin resistance  
Hyperglycemia

Myocardial hypertrophy  
Insulin resistance  
Angiogenesis ↓

**Putative mechanisms underlying CHF pathophysiology**

SGLT2i  
Sacubitril/Valsartan

**Proven cardiovascular benefits**

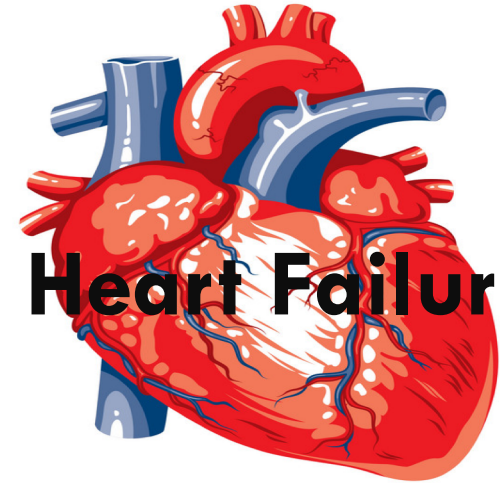

**Heart Failure**

Vaptans (?)  
Recombinant human GH  
Liothyronine  
Levothyroxine  
Testosterone  
Estradiol

**Do they have potential for therapeutic use?**
